# Supplementary material for: Vertical Alignment of Liquid Crystal on Sustainable 2,4-Di-tert-butylphenoxymethyl-Substituted Polystyrene Films
Source: Polymers (Basel). 2022 Mar 23;14(7):1302. doi: 10.3390/polym14071302 (PMC9002882; doi:10.3390/polym14071302)
Supplement: Supplementary file 1 [file polymers-14-01302-s001.zip › polymers-1628540-supplementary.pdf]

# Supplementary Materials: Vertical Alignment of Liquid Crystal on Sustainable 2,4-Di-*tert*-butylphenoxymethyl-substituted Polystyrene Films

DaEun Yang, Chowon Jin and Hyo Kang

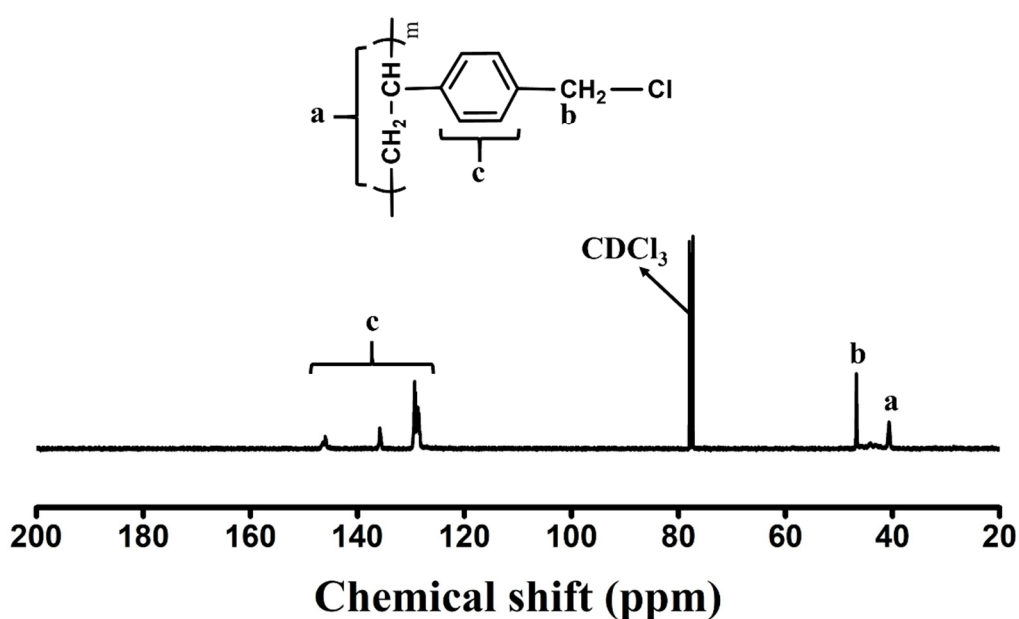

Figure S1.  $^{13}\text{C}$  nuclear magnetic resonance ( $^{13}\text{C}$  NMR) spectrum of PCMS.

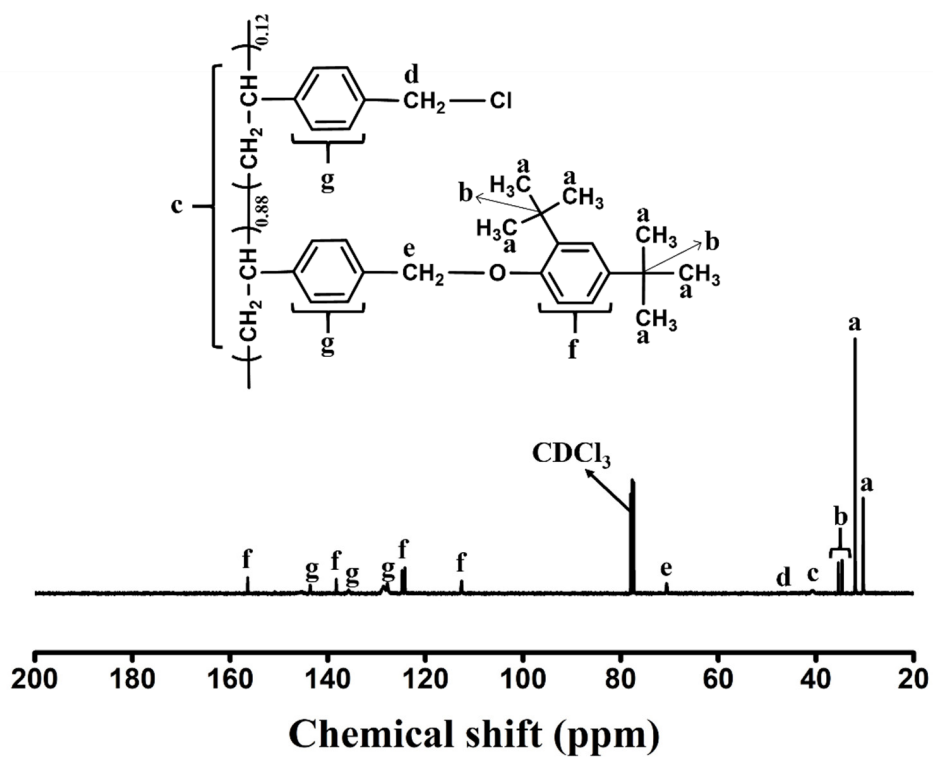

Figure S2.  $^{13}\text{C}$  nuclear magnetic resonance ( $^{13}\text{C}$  NMR) spectrum of PDtBP88.

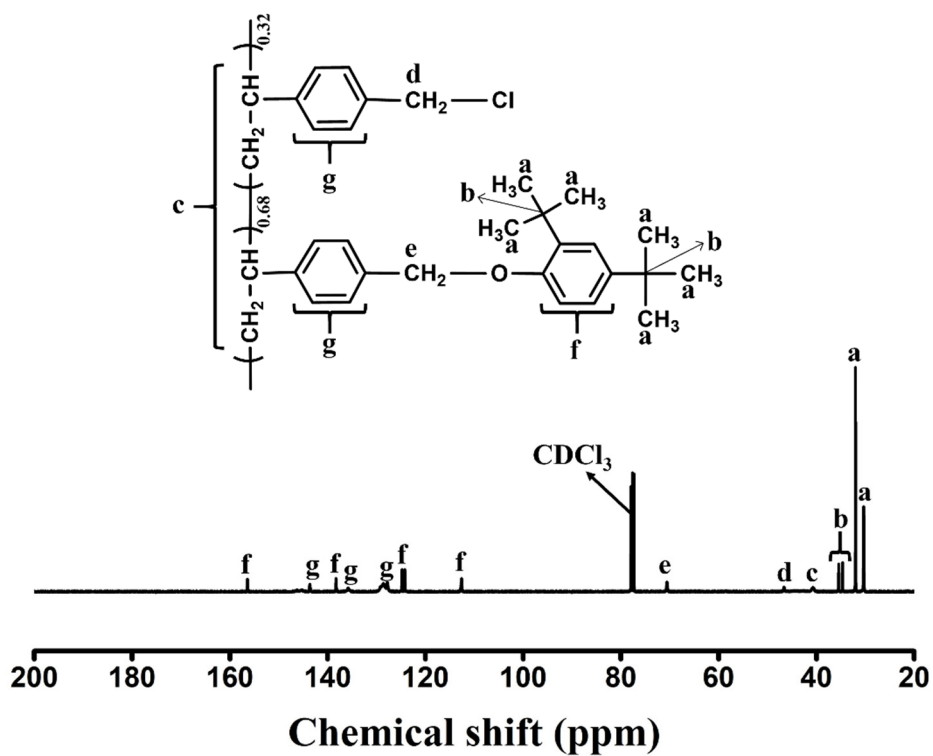

Figure S3.  $^{13}\text{C}$  nuclear magnetic resonance ( $^{13}\text{C}$  NMR) spectrum of PDtBP68.

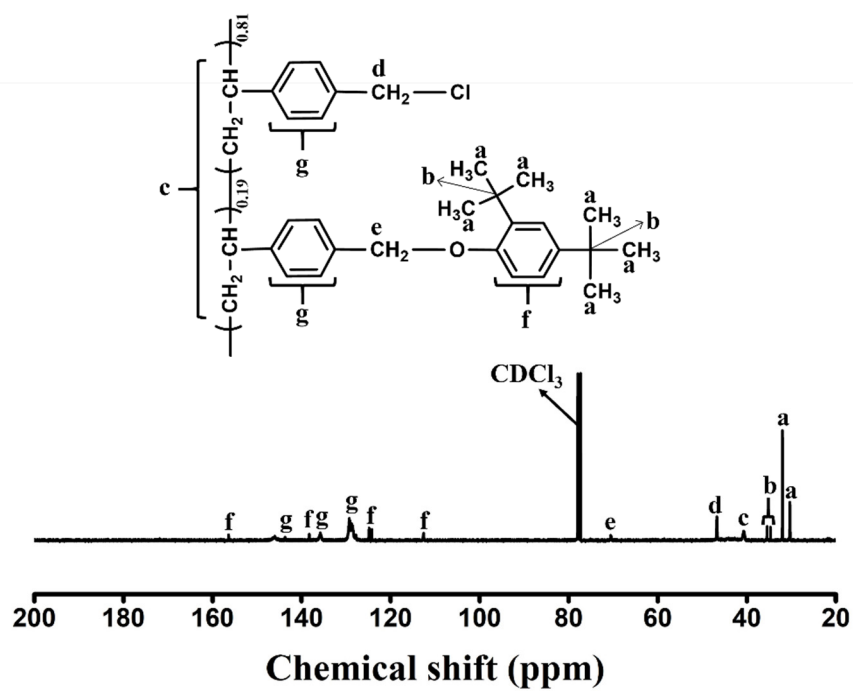

**Figure S4.**  $^{13}\text{C}$  nuclear magnetic resonance ( $^{13}\text{C}$  NMR) spectrum of PDtBP19.

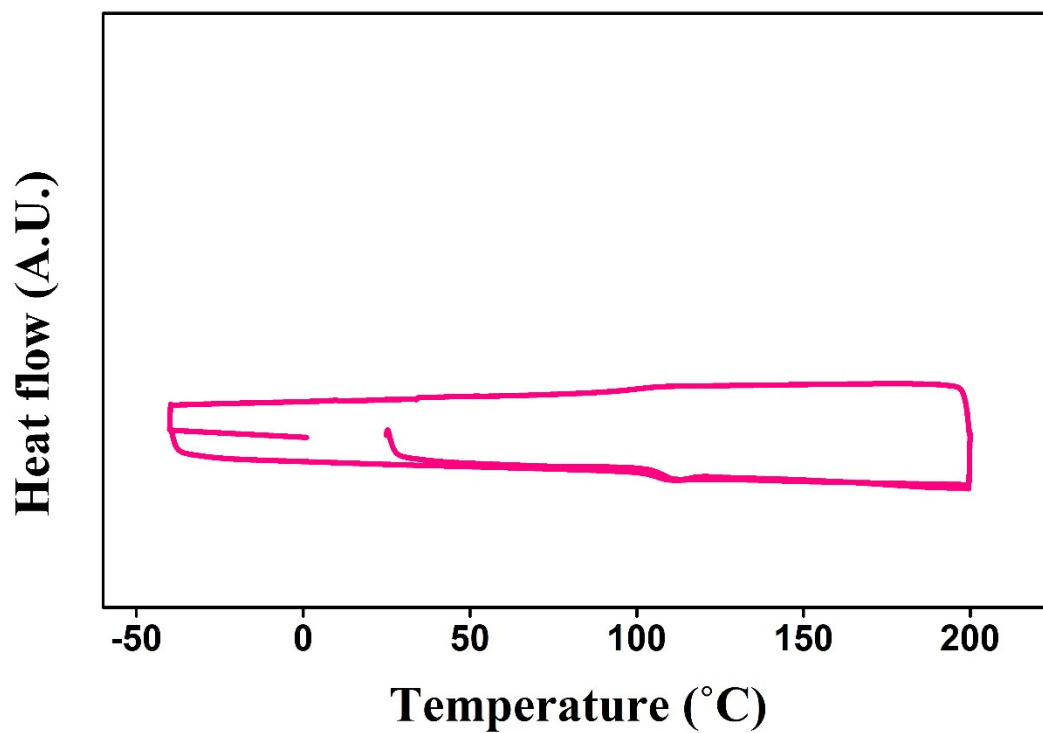

**Figure S5.** Differential scanning calorimetry (DSC) thermogram of PCMS during the full heating cycles.

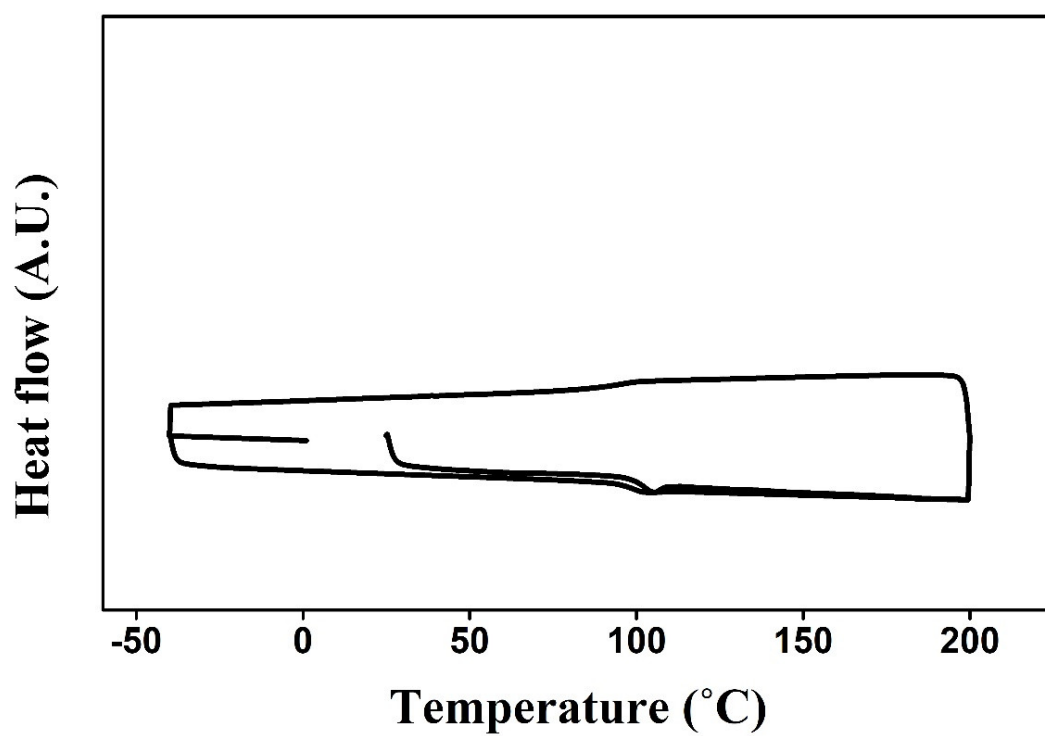

**Figure S6.** Differential scanning calorimetry (DSC) thermogram of PDtBP88 during the full heating cycles.

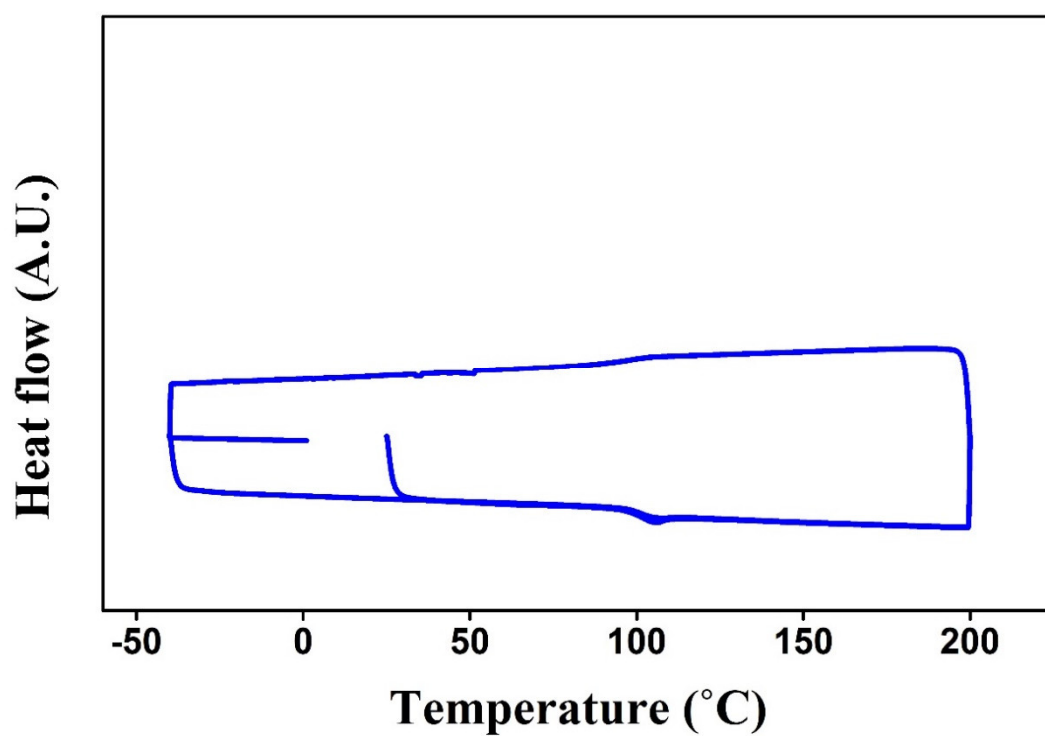

**Figure S7.** Differential scanning calorimetry (DSC) thermogram of PDtBP68 during the full heating cycles.

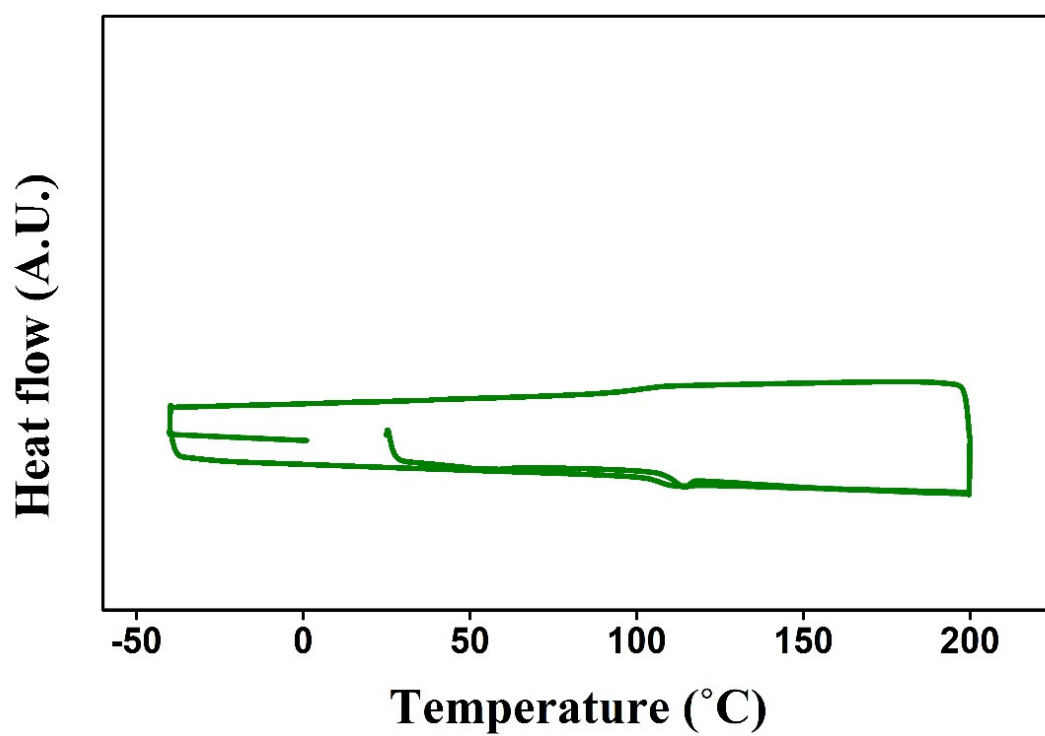

**Figure S8.** Differential scanning calorimetry (DSC) thermogram of PDtBP35 during the full heating cycles.

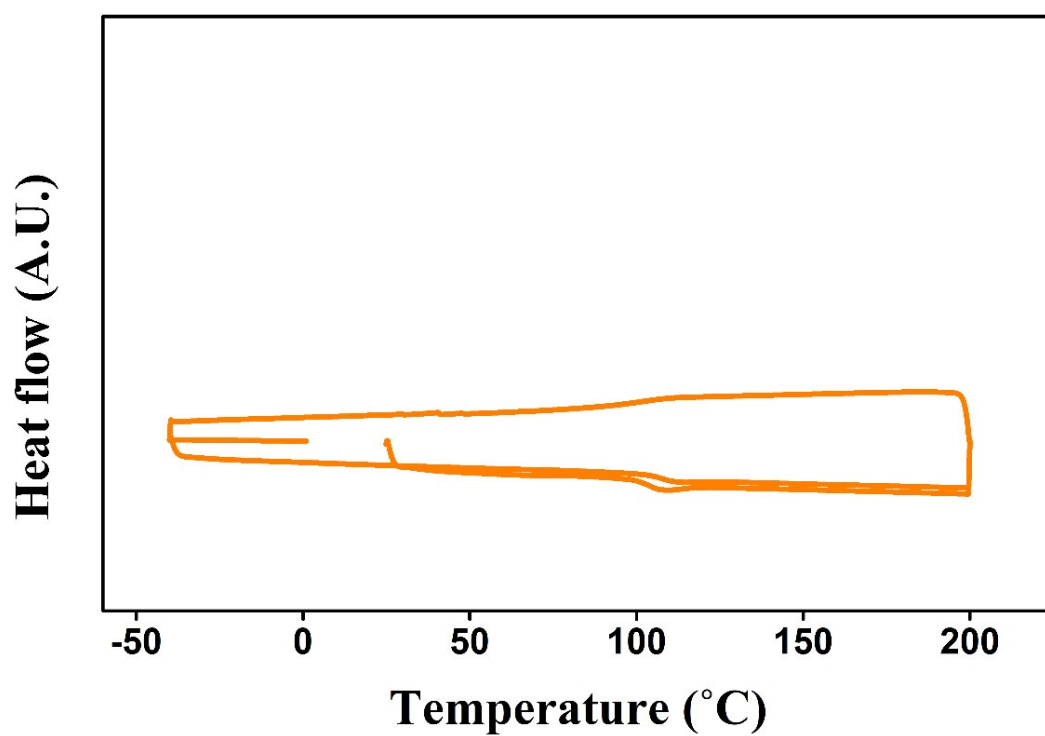

**Figure S9.** Differential scanning calorimetry (DSC) thermogram of PDtBP19 during the full heating cycles.
